# Supplementary material for: Sanctions pénales -- Compétence de la Communauté ("Sanctions pénales réprimant la pollution causée par les navires")
Source: HighWire-hosted journal article supplement (doi:10.1136/gutjnl-2021-324868), 2008-01-01
Supplement: gutjnl-2021-324868supp004_data_supplement.pdf [file gutjnl-2021-324868supp004_data_supplement.pdf]

# Supplementary Figure 4

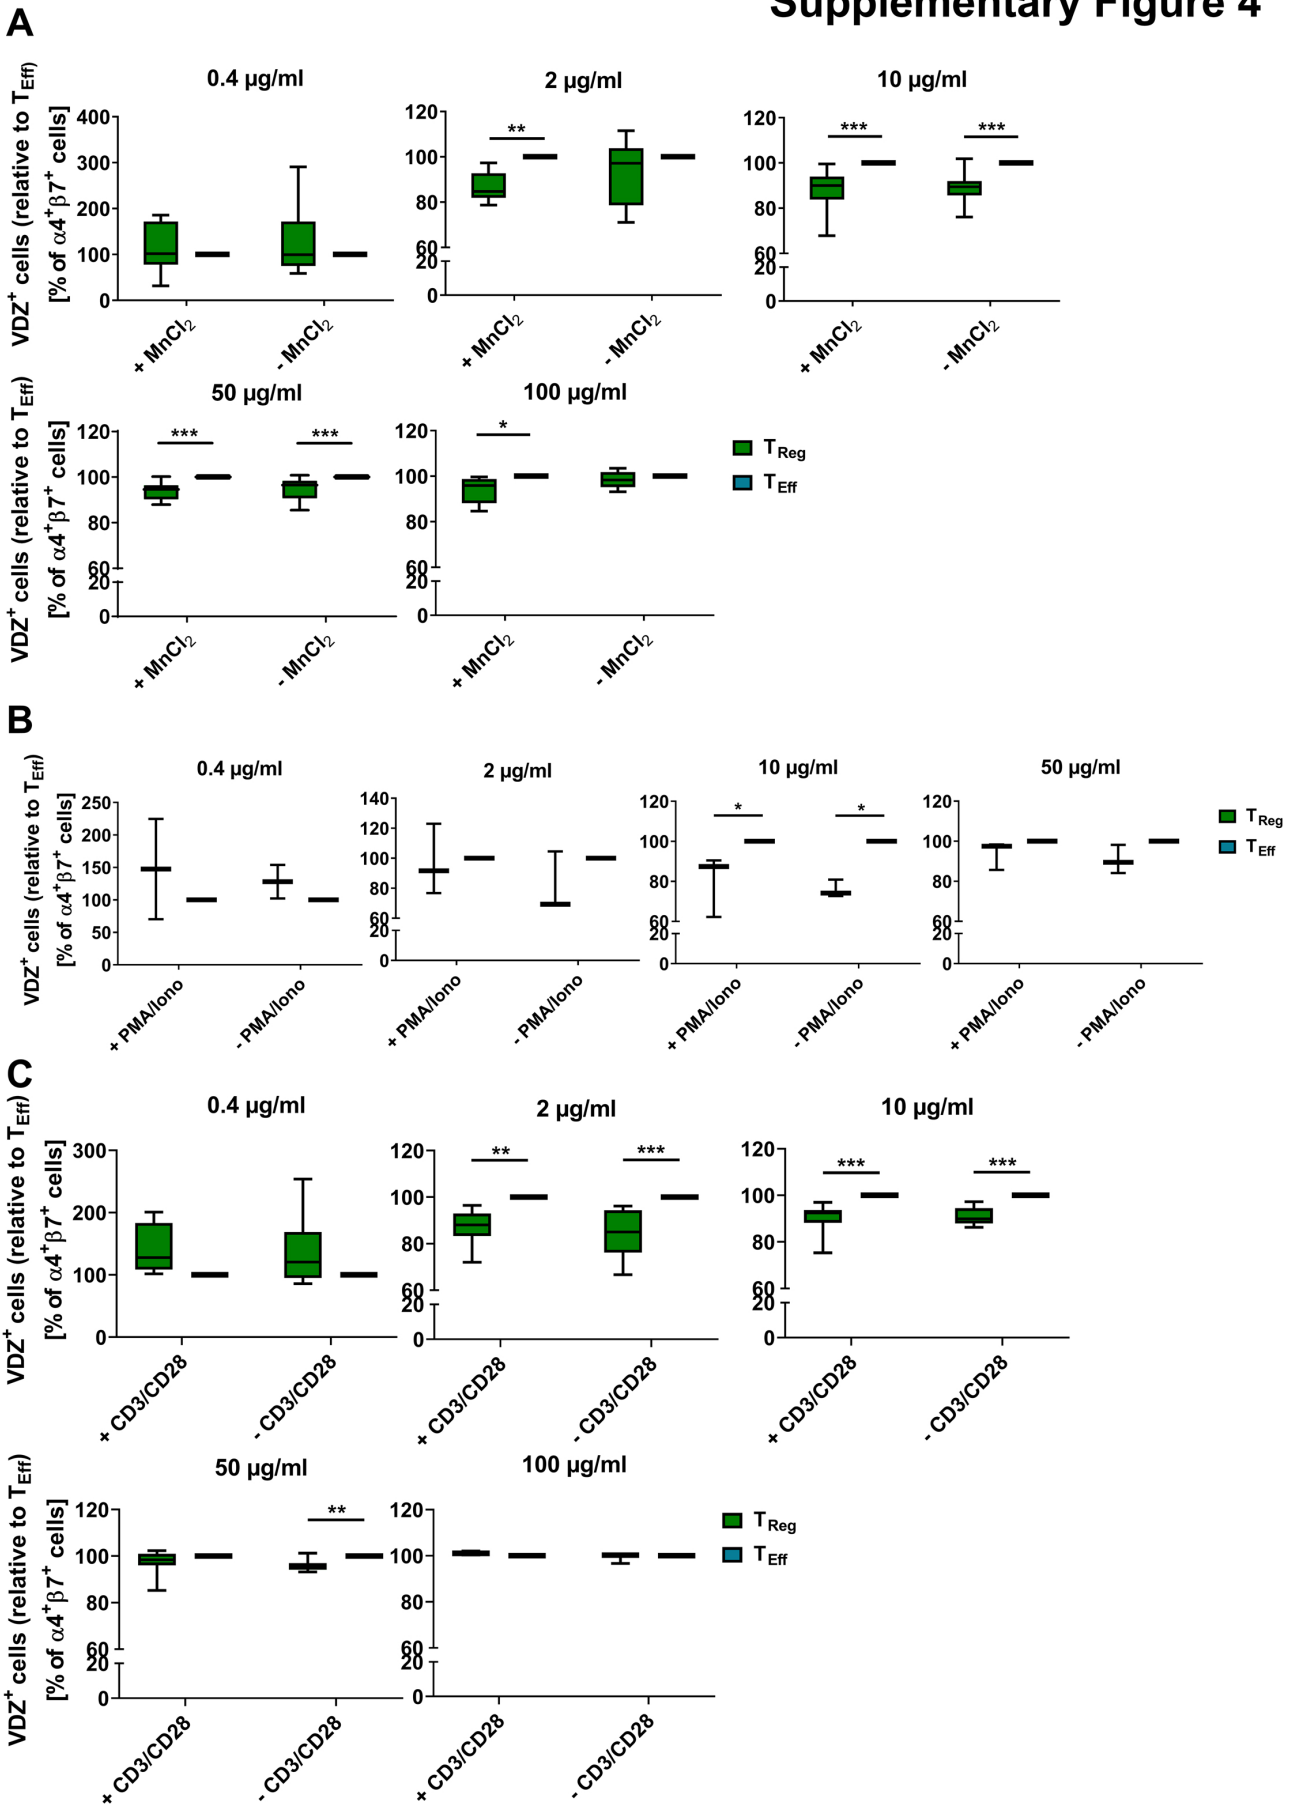

**Supplementary Figure 4: Concentration-dependent binding profile of vedolizumab to T<sub>Reg</sub> and T<sub>Eff</sub> cells under different culture conditions.**

**(A), (B), (C)** Quantitative flow cytometry of VDZ<sup>+</sup> cells among  $\alpha 4\beta 7^+$  T<sub>Reg</sub> and T<sub>Eff</sub> cells after incubation or stimulation with MnCl<sub>2</sub> (A), PMA/ionomycin (B) or anti-CD3/CD28 (C) and subsequent staining with the indicated concentrations of fluorescently labelled VDZ. Data are expressed relative to T<sub>Eff</sub> cells. Statistical significance was calculated using Student's t-test and mixed-effects analysis with Sidak's multiple comparison test. n = 2-14 healthy controls per group.

Sample donor characteristics are listed in *Supplementary Table S14*.
