# Supplementary material for: Sanctions pénales -- Compétence de la Communauté ("Sanctions pénales réprimant la pollution causée par les navires")
Source: HighWire-hosted journal article supplement (doi:10.1136/gutjnl-2021-324868), 2008-01-01
Supplement: gutjnl-2021-324868supp005_data_supplement.pdf [file gutjnl-2021-324868supp005_data_supplement.pdf]

Supplementary Figure 5

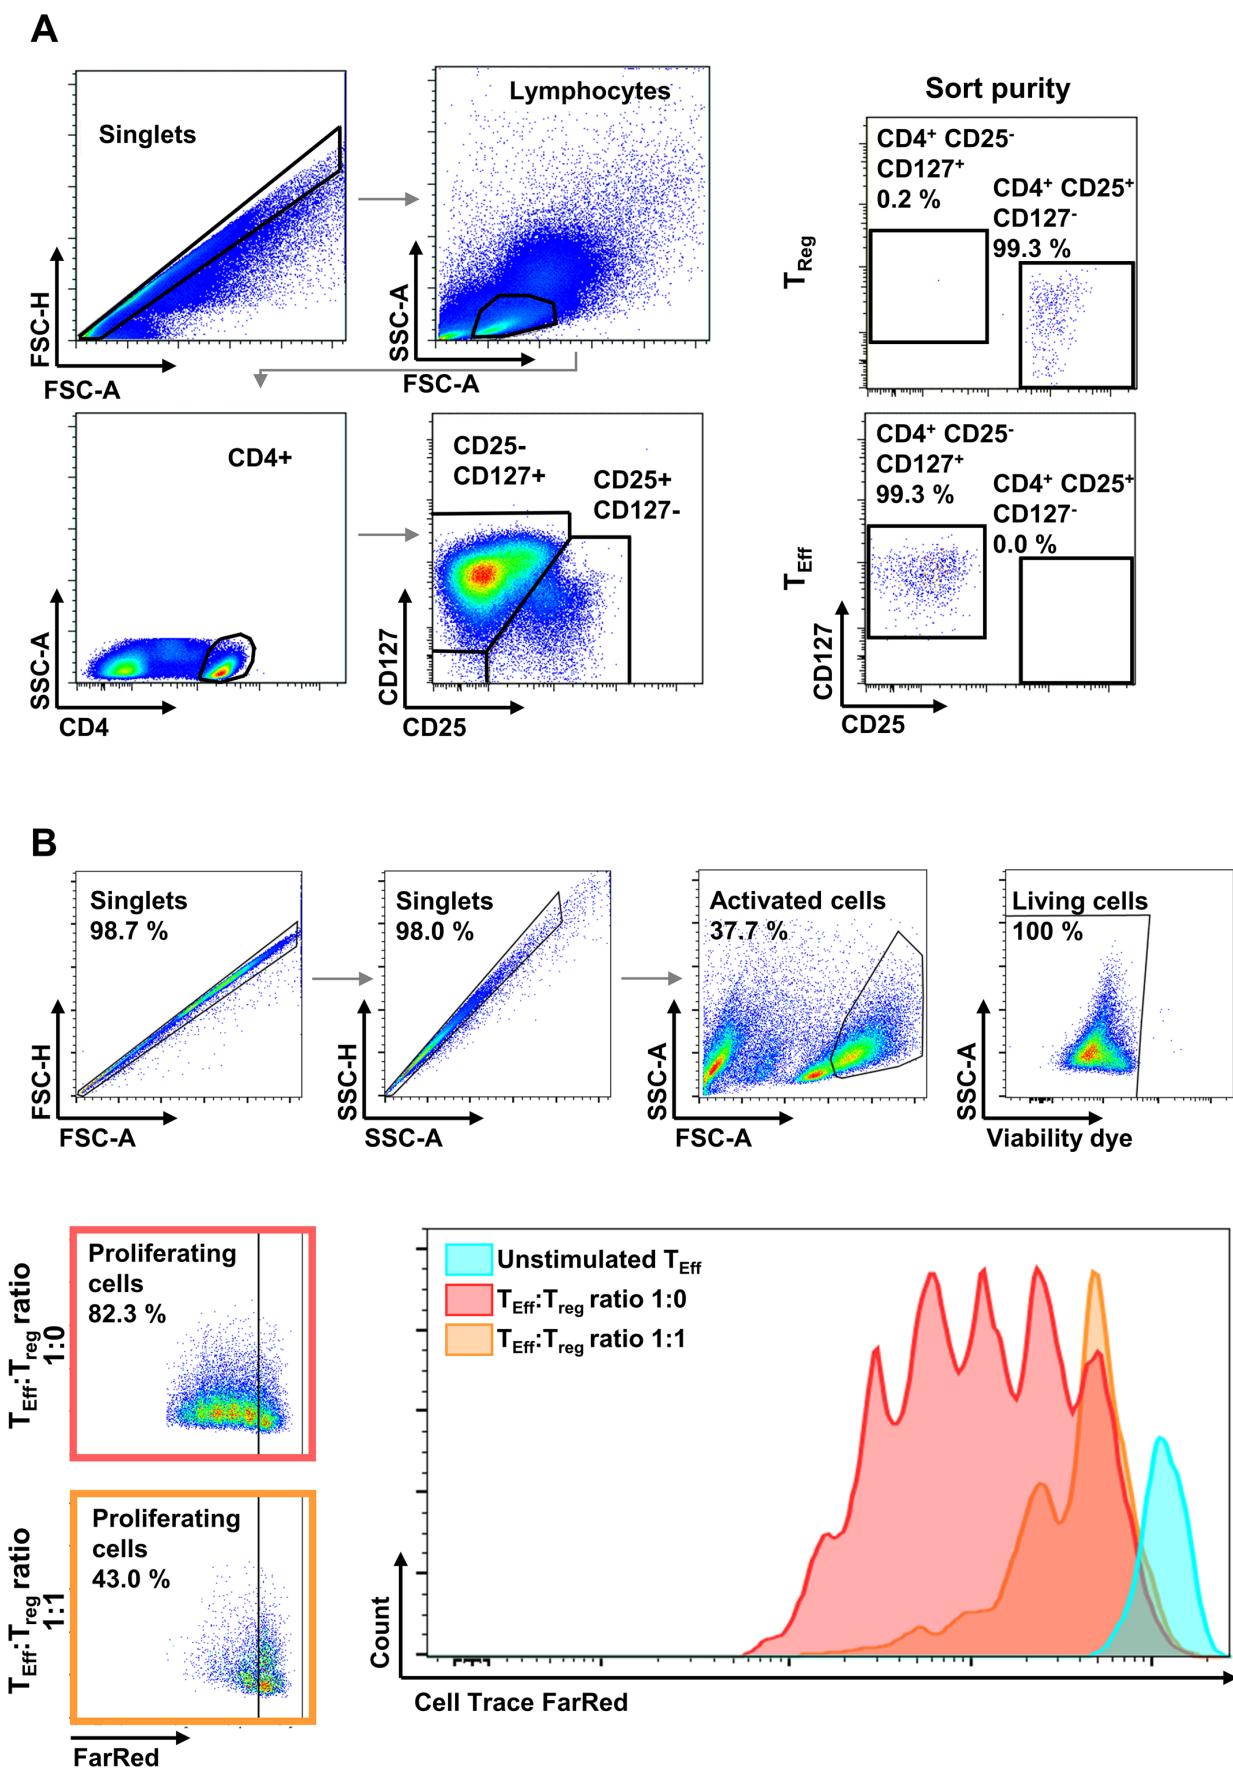

**Supplementary Figure 5: Purity and suppressive function of FACS-isolated T<sub>Reg</sub> and T<sub>Eff</sub> cells.**

**(A)** Left panels: Representative gating strategy for FACS-based isolation of T<sub>Reg</sub> and T<sub>Eff</sub> cells. Right panels: Re-analysis of isolated cells. T<sub>Eff</sub> cells were characterised as CD4<sup>+</sup>CD127<sup>+</sup>CD25<sup>-</sup>, T<sub>Reg</sub> cells as CD4<sup>+</sup>CD127<sup>-</sup>CD25<sup>+</sup>.

**(B)** Representative flow cytometry of T<sub>Eff</sub> cell proliferation as determined by dilution of Cell Trace FarRed. Representative images from 1 out of 3 independent experiments (cells purified from leukocyte cones).
