# Supplementary material for: Sanctions pénales -- Compétence de la Communauté ("Sanctions pénales réprimant la pollution causée par les navires")
Source: HighWire-hosted journal article supplement (doi:10.1136/gutjnl-2021-324868), 2008-01-01
Supplement: gutjnl-2021-324868supp008_data_supplement.pdf [file gutjnl-2021-324868supp008_data_supplement.pdf]

## Supplementary Figure 8

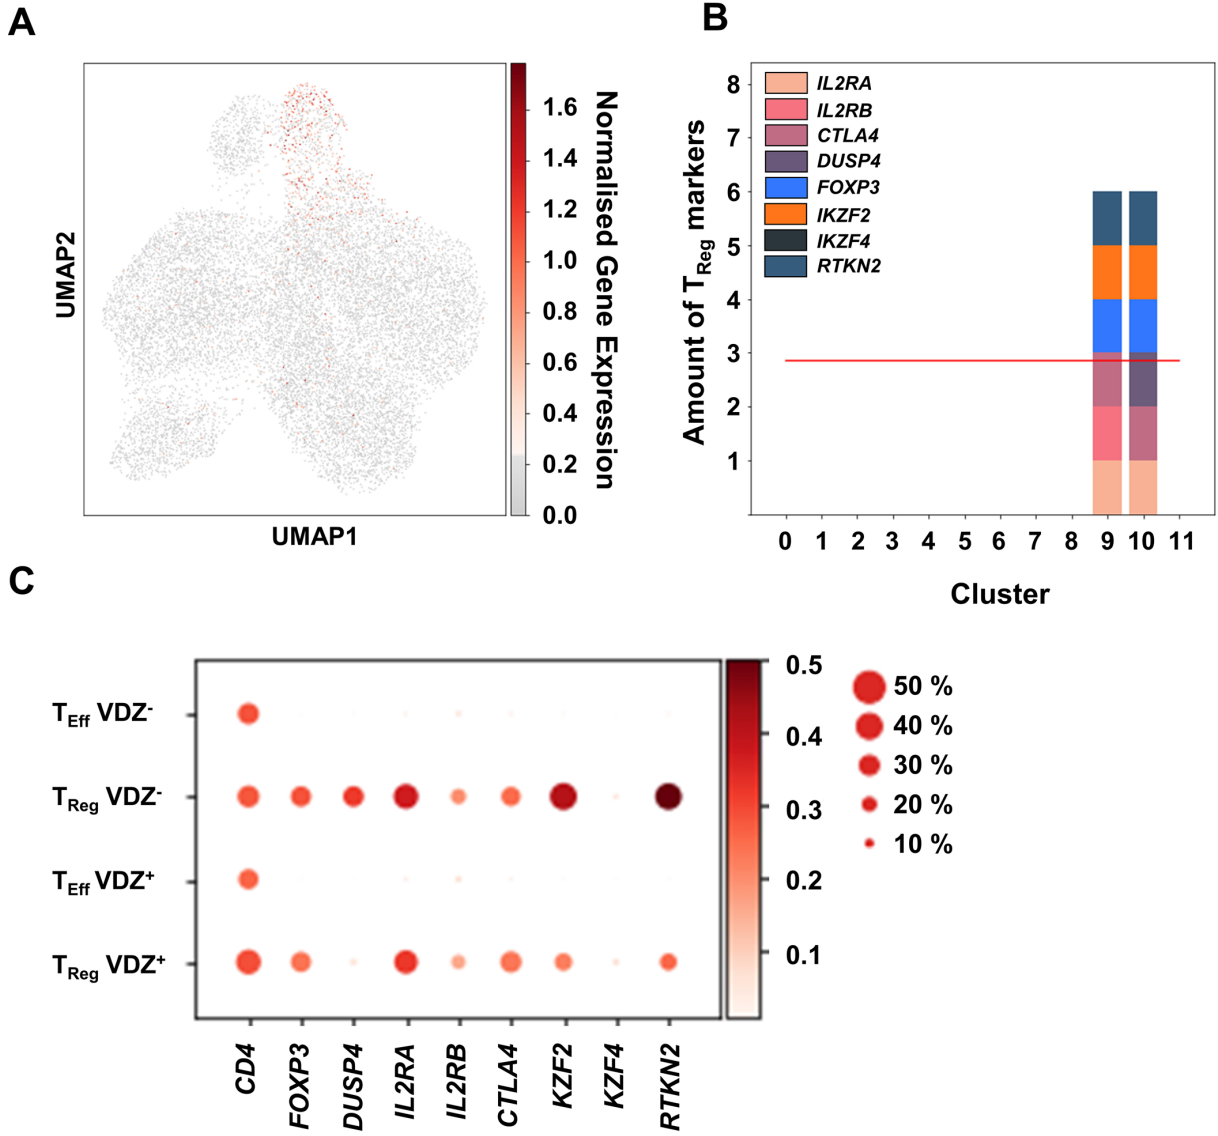

**Supplementary Figure 8: Characterisation of T<sub>Reg</sub> cell subclusters in single cell RNA sequencing analysis.**

**(A)** UMAP plot showing cells expressing *FOXP3*.

**(B)** Identification of subcluster 9 and 10 as T<sub>Reg</sub> cell clusters based on the expression of 8 different marker genes for T<sub>Reg</sub> cells.

**(C)** Heat map showing differential gene expression and portion of cells expressing eight prominent T<sub>Reg</sub> cell marker genes in VDZ<sup>-</sup> and VDZ<sup>+</sup> T<sub>Reg</sub> and T<sub>Eff</sub> cells.
