# Supplementary material for: Sanctions pénales -- Compétence de la Communauté ("Sanctions pénales réprimant la pollution causée par les navires")
Source: HighWire-hosted journal article supplement (doi:10.1136/gutjnl-2021-324868), 2008-01-01
Supplement: gutjnl-2021-324868supp009_data_supplement.pdf [file gutjnl-2021-324868supp009_data_supplement.pdf]

## Supplementary Figure 9

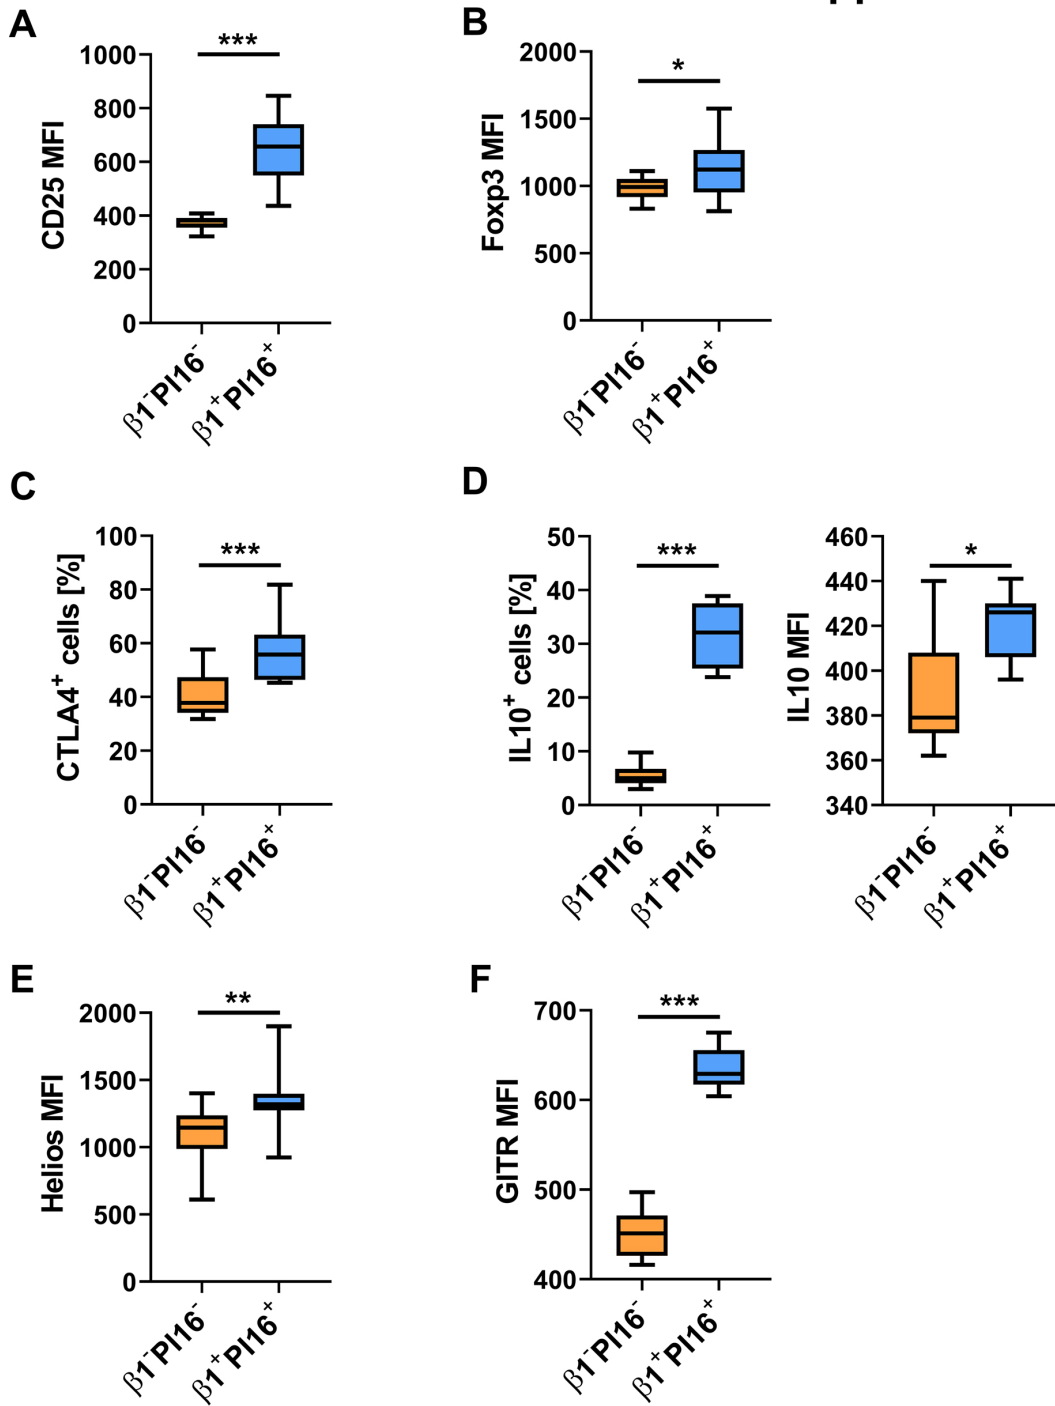

**Supplementary Figure 9: Characterisation of vedolizumab-“resistant”  $\beta 1^{+}PI16^{+}\alpha 4^{+}\beta 7^{+}$  T<sub>Reg</sub> cells in the peripheral blood of IBD patients**

**(A,B)** Quantitative flow cytometry showing mean fluorescence intensity (MFI) of CD25 (A) and Foxp3 (B) on  $\beta 1^{+}PI16^{+}\alpha 4^{+}\beta 7^{+}$  T<sub>Reg</sub> compared with  $\beta 1^{-}PI16^{-}\alpha 4^{+}\beta 7^{+}$  T<sub>Reg</sub> cells. n = 11 IBD patients.

**(C)** Quantitative flow cytometry showing the frequency of CTLA4-expressing  $\beta 1^{+}PI16^{+}\alpha 4^{+}\beta 7^{+}$  T<sub>Reg</sub> compared with  $\beta 1^{-}PI16^{-}\alpha 4^{+}\beta 7^{+}$  T<sub>Reg</sub> cells. n = 11 IBD patients.

**(D)** Quantitative flow cytometry showing the frequency and mean fluorescence intensity (MFI) of IL10 on  $\beta 1^{+}PI16^{+}\alpha 4^{+}\beta 7^{+}$  T<sub>Reg</sub> compared with  $\beta 1^{-}PI16^{-}\alpha 4^{+}\beta 7^{+}$  T<sub>Reg</sub> cells after incubation with PMA, ionomycin and brefeldin A for 4 h. n = 11 IBD patients.

**(E,F)** Quantitative flow cytometry showing mean fluorescence intensity (MFI) of Helios (E) and GITR (F) on  $\beta 1^{+}PI16^{+}\alpha 4^{+}\beta 7^{+}$  T<sub>Reg</sub> compared with  $\beta 1^{-}PI16^{-}\alpha 4^{+}\beta 7^{+}$  T<sub>Reg</sub> cells. n = 11 IBD patients.

Statistical comparisons were performed using paired t-test.

Sample donor characteristics are listed in *Supplementary Table S15*.
