# Supplementary material for: Sanctions pénales -- Compétence de la Communauté ("Sanctions pénales réprimant la pollution causée par les navires")
Source: HighWire-hosted journal article supplement (doi:10.1136/gutjnl-2021-324868), 2008-01-01
Supplement: gutjnl-2021-324868supp019_data_supplement.pdf [file gutjnl-2021-324868supp019_data_supplement.pdf]

Supplementary Table 9: Patient information for Figure 8

|                                 |                            | CD         | UC         |
|---------------------------------|----------------------------|------------|------------|
| <b>Number Patients</b>          |                            | 8          | 2          |
| <b>Number Samples</b>           |                            | 10         | 2          |
| <b>Age (Ø, range)</b>           |                            | 39 (17-63) | 42 (26-58) |
| <b>Female [%]</b>               |                            | 70.0       | 0.0        |
| <b>HBI (Ø, range)</b>           |                            | 5 (2-8)    |            |
| <b>Mayo c.s. (Ø, range)</b>     |                            |            | 1.5 (1-2)  |
| <b>Therapy [%]</b>              | <i>Aminosalisylates</i>    | 37.5       | 50.0       |
|                                 | <i>Steroids</i>            | 0.0        | 0.0        |
|                                 | <i>Immunosuppressants</i>  | 0.0        | 0.0        |
|                                 | <i>Anti-TNF antibodies</i> | 62.5       | 0.0        |
|                                 | <i>Vedolizumab</i>         | 0.0        | 0.0        |
|                                 | <i>Ustekinumab</i>         | 37.5       | 100.0      |
| <b>Disease localization [%]</b> |                            | L1: 30.0   | E1: 0.0    |
|                                 |                            | L2: 30.0   | E2: 0.0    |
|                                 |                            | L3: 30.0   | E3: 100.0  |
|                                 |                            | L4: 0.0    |            |
|                                 |                            | L4+: 10.0  |            |
