# Supplementary material for: Sanctions pénales -- Compétence de la Communauté ("Sanctions pénales réprimant la pollution causée par les navires")
Source: HighWire-hosted journal article supplement (doi:10.1136/gutjnl-2021-324868), 2008-01-01
Supplement: gutjnl-2021-324868supp024_data_supplement.pdf [file gutjnl-2021-324868supp024_data_supplement.pdf]

**Supplementary Table 14: Patient information for Supplementary Figure 4**

|                        | <b>CON</b> |
|------------------------|------------|
| <b>Number Patients</b> | 23         |
| <b>Number Samples</b>  | 28         |
| <b>Age (Ø, range)</b>  | 32 (19-44) |
| <b>Female [%]</b>      | 85.7       |
